# Supplementary material for: Sustainable waste mitigation: biotemplated nanostructured ZnO for photocatalytic water treatment via extraction of biofuels from hydrothermal carbonization of banana stalk
Source: Royal Society of Chemistry journal article supplement (doi:10.1039/c6ra21663c), 2016-01-01
Supplement: c6ra21663c1.pdf [file c6ra21663c1.pdf]

**Sustainable waste mitigation: Biotemplated nanostructured ZnO for photocatalytic water treatment via extraction of biofuels from hydrothermal carbonization of banana stalk**

Ayush Upneja<sup>1,2</sup>, Guolan Dou<sup>2,3</sup>, Chitanya Gopu<sup>2</sup>, Carol Johnson<sup>2,4</sup>, Anna Newman<sup>4</sup>, Azat Suleimenov<sup>4</sup>, Jillian L. Goldfarb<sup>2,4\*</sup>

1. Newton South High School, 140 Brandeis Road, Newton Centre, MA 02459, USA
2. Department of Mechanical Engineering, Boston University, 110 Cummington Mall, Boston MA 02215, USA
3. School of Safety Engineering, China University of Mining & Technology, Xuzhou 221116, China
4. Division of Materials Science & Engineering, Boston University, 15 St. Mary's Street, Brookline, MA 02446, USA

**Supplemental Information** (for online publication only)

---

\* To whom correspondence should be addressed: [jiliang@bu.edu](mailto:jiliang@bu.edu); [JillianLGoldfarb@gmail.com](mailto:JillianLGoldfarb@gmail.com), (617) 353 3883

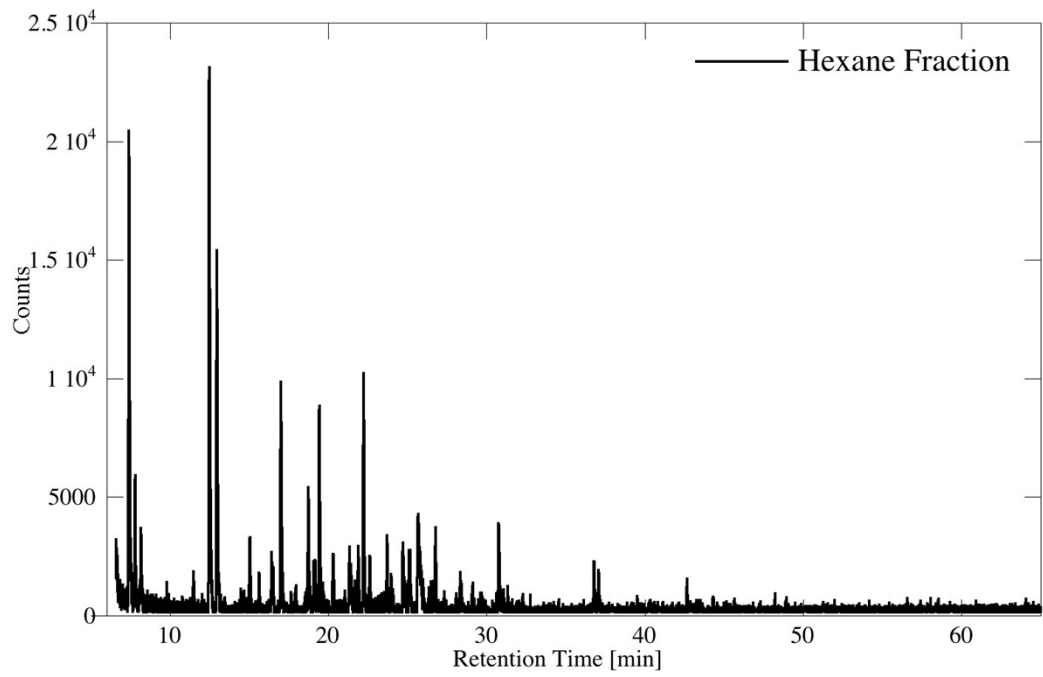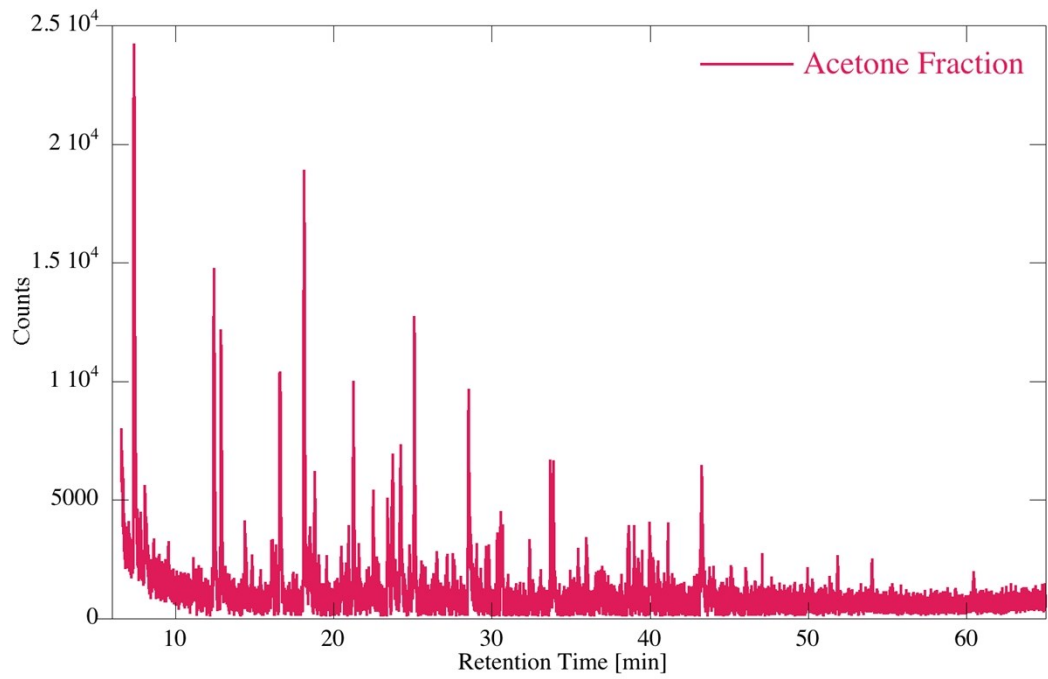

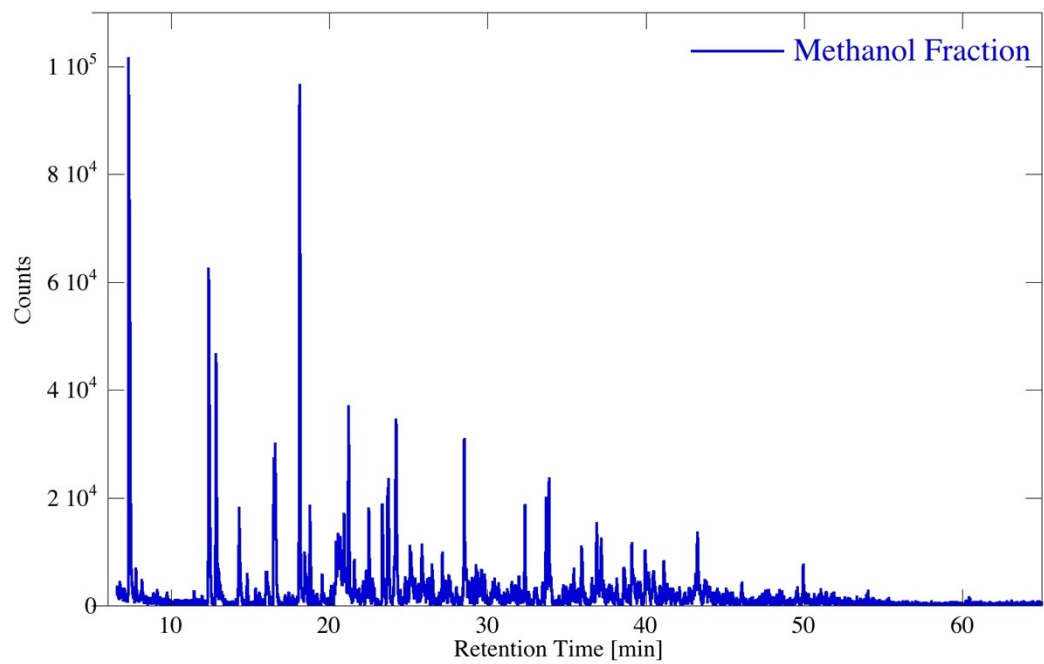

**Figure S1.** Chromatograms of hexane, acetone and methanol fractions of hydrothermal banana stalk bio-oil
